# Supplementary figures and images for: Peer-Led Self-Management of General Medical Conditions for Patients With Serious Mental Illnesses: A Randomized Trial
Source: Atypon-hosted journal article supplement (doi:10.1176/appi.ps.201700352), 2018-02-01

**Figure 1: CONSORT Flow Diagram**

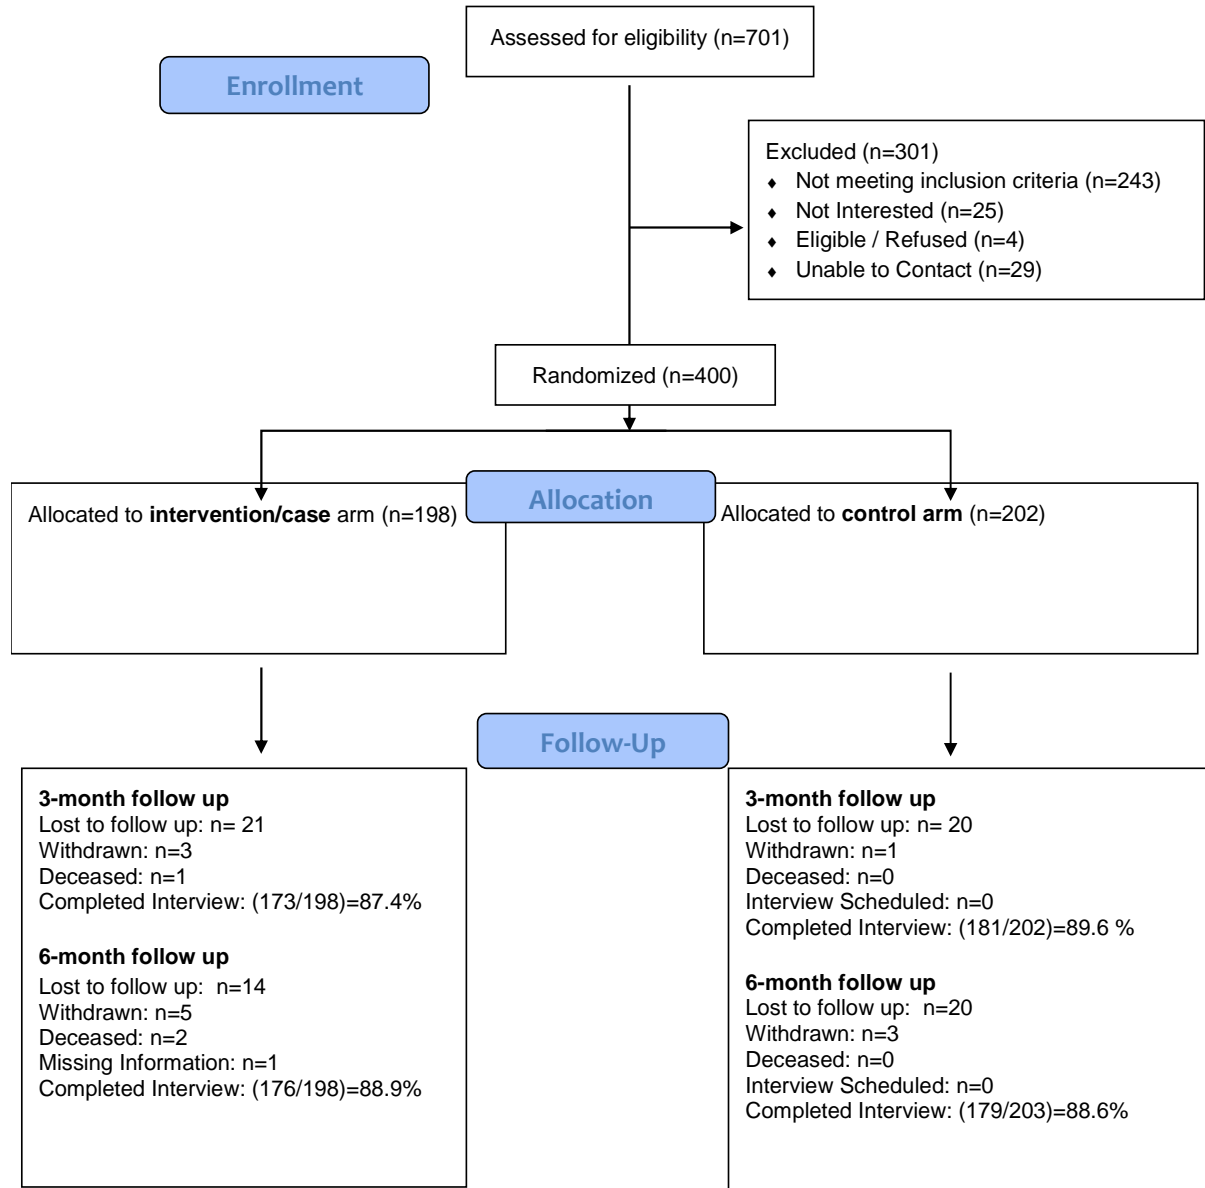

Supplement: appi.ps.201700352.ds001.pdf [file appi.ps.201700352.ds001.pdf]
